# Supplementary material
Source: ML conference proceedings conference paper supplement (https://proceedings.neurips.cc/paper_files/paper/2022/hash/1074541383db5ef12d6ac66d2f8e8d34-Abstract.html)
Supplement: Supplementary file 1 [file 1074541383db5ef12d6ac66d2f8e8d34-Supplemental-Conference.zip]

Archive with 1 entries (1 files):
- 10789-17-20.pdf
